# Supplementary material for: Development of a radiopaque, long-term drug eluting bioresorbable stent for the femoral-iliac artery
Source: Royal Society of Chemistry journal article supplement (doi:10.1039/c9ra06179g), 2019-01-01
Supplement: c9ra06179g1.pdf [file c9ra06179g1.pdf]

Electronic Supporting Information for

## **Development of radiopaque, long-term drug eluting bioresorbable stent for femoral-iliac artery**

Dong-Heon Ha<sup>a</sup>, Jae Yun Kim<sup>b</sup>, Tae Sik Park<sup>c</sup>, Jong Ha Park<sup>c</sup>, Suhun Chae<sup>a</sup>, Byoung Soo Kim<sup>a</sup>, Han Cheol Lee<sup>c</sup>, and Dong-Woo Cho<sup>a</sup>

<sup>1</sup> Department of Mechanical Engineering, Pohang University of Science and Technology (POSTECH), Pohang, Gyeongbuk, Korea

<sup>2</sup> School of Interdisciplinary Bioscience and Bioengineering, Pohang University of Science and Technology (POSTECH), Pohang, Gyeongbuk, Korea

<sup>5</sup> Division of Cardiology, Department of Internal Medicine, College of Medicine, Pusan National University, Busan, Korea

Corresponding E-mail: [dwcho@postech.ac.kr](mailto:dwcho@postech.ac.kr)

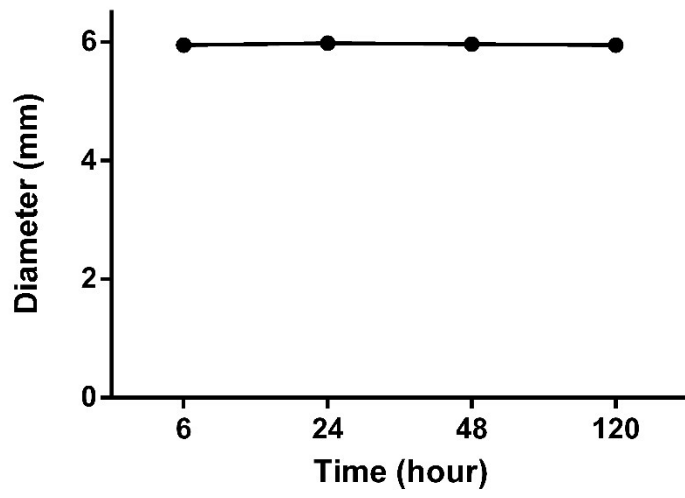

Fig S 1. Stent outer diameter of expanded BRS stent

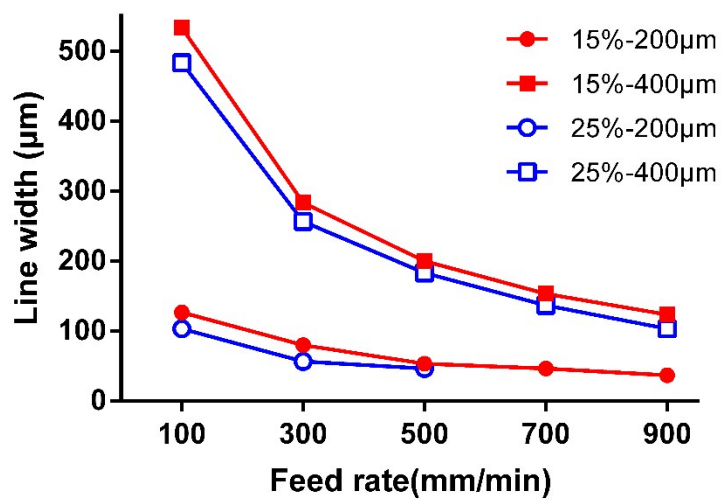

Fig S 2. Printing line width of the contrast powder mixed PCL (concentration – nozzle diameter)
